# Supplementary material for: Longitudinal changes in EEG power, sleep cycles and behaviour in a tau model of neurodegeneration
Source: Springer Nature journal article supplement (doi:10.1186/s13195-020-00651-0), 2020-07-15
Supplement: MOESM1 [file 18186310]

**A** Spectral Power – Dark phase First Week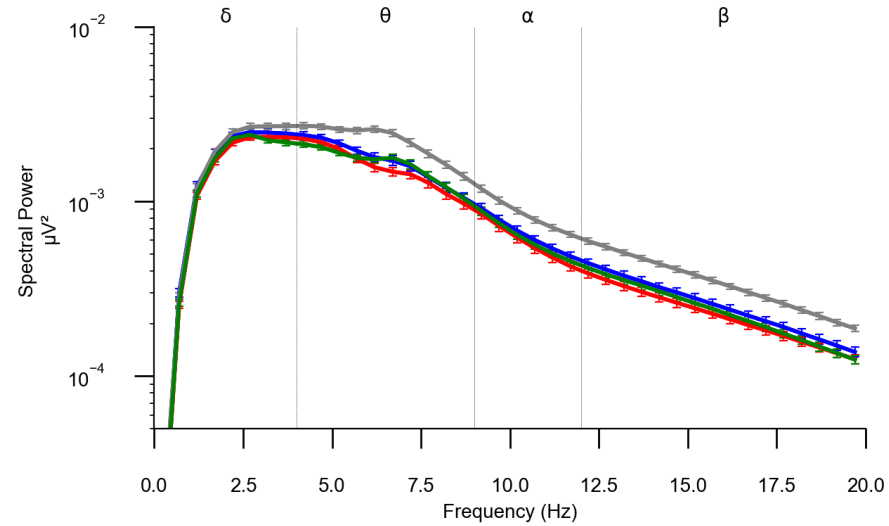**B** Spectral Power – Light phase First Week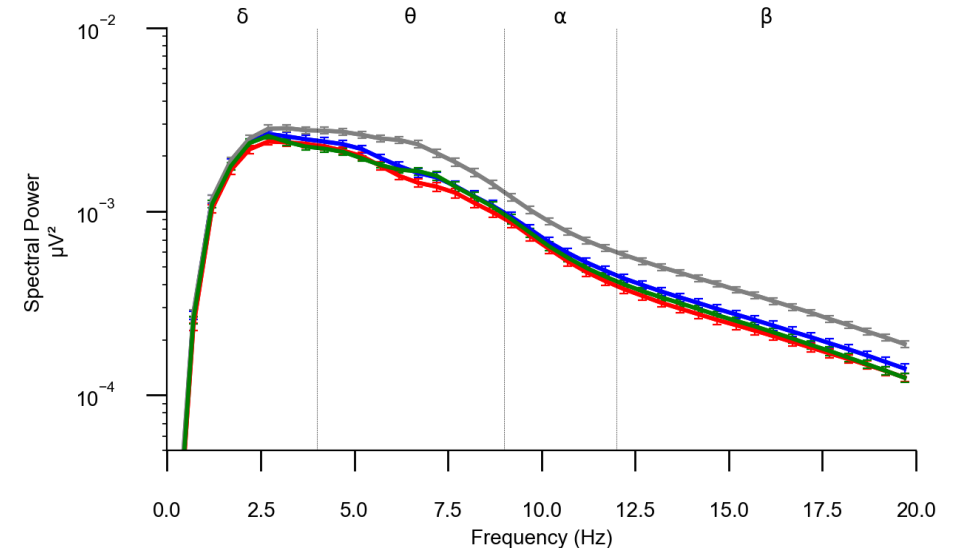**C** Spectral Power – Dark phase Last Week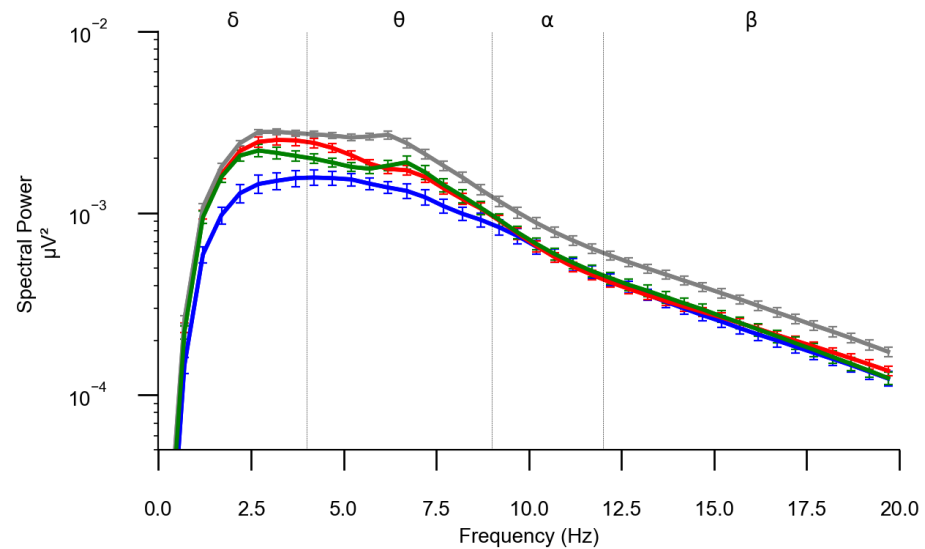**D** Spectral Power – Light phase Last Week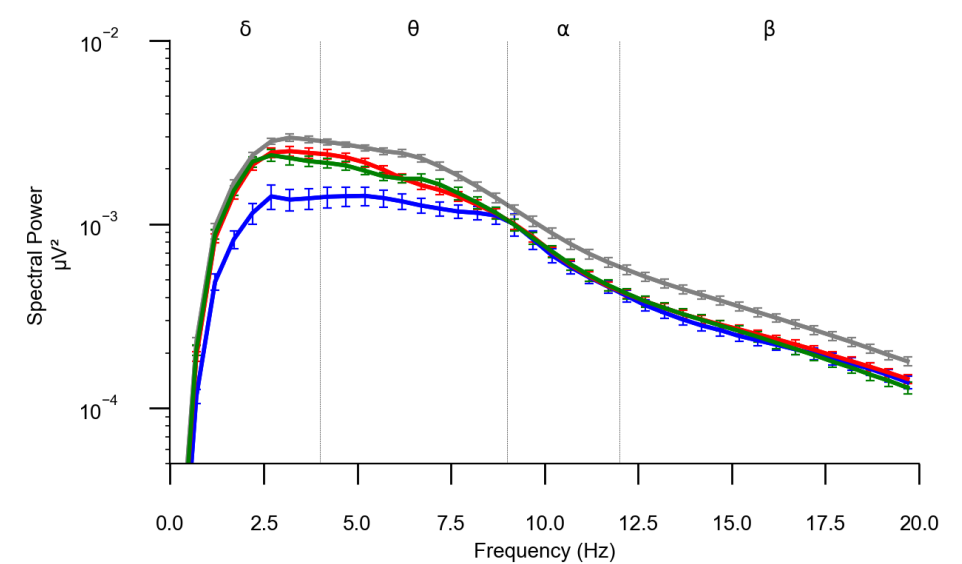

■ Tg4510 Tg ■ Tg4510 Tg + DOX ■ Tg4510 tTA ■ Tg4510 WT
